# Supplementary material
Source: HighWire-hosted journal article supplement (https://jnm.snmjournals.org/highwire/filestream/94345/field_highwire_adjunct_files/0/99408_Supplemental_Data.pdf)
Supplement: 99408_Supplemental_Data.pdf [file 99408_Supplemental_Data.pdf]

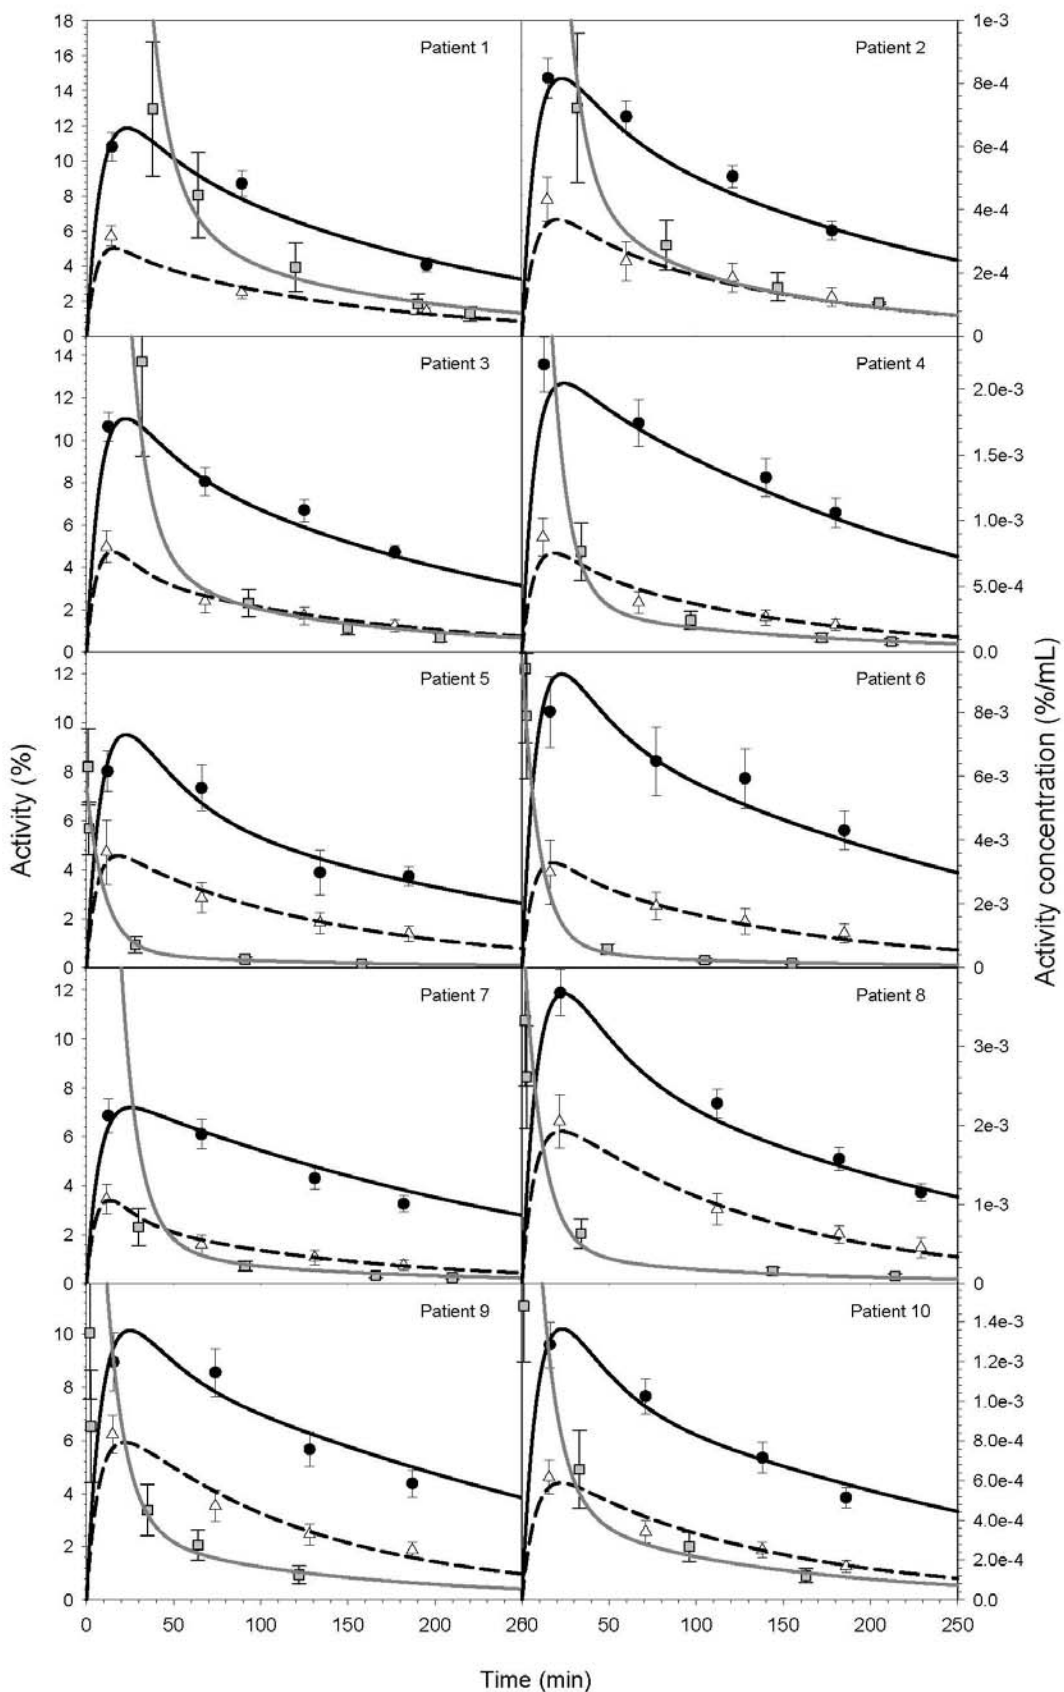

**Supplemental Figure 1:** Comparison between the data measured in the patients and the results of the individual analysis using the compartmental structure of Figure 2. Black dots and black straight line: Liver. White triangles and black dashed line: Kidneys. Grey squares and grey full line: Blood. Left y-axis refer to Liver and Kidney data, Right y-axis to Blood. Uncertainty bars as in Figure 1.
